# Supplementary material
Source: publisher figshare collection journal article supplement (https://gsapubs.figshare.com/ndownloader/files/22743710)
Supplement: Supplementary file 1 [file 22743710]

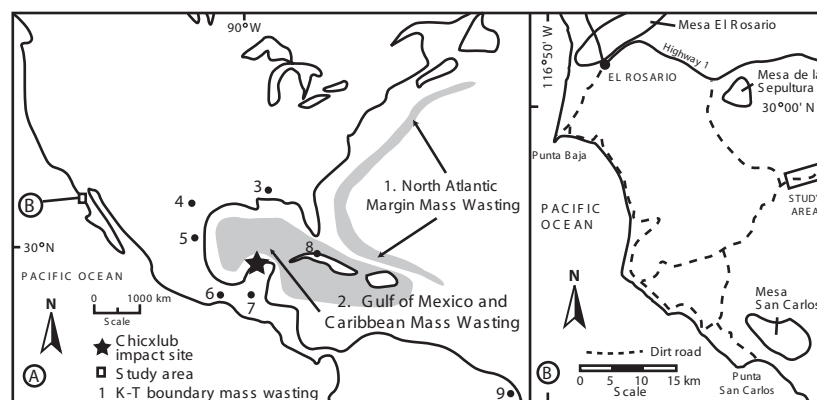

Figure 1. A: Sites of catastrophic sedimentation at Cretaceous-Tertiary boundary in and around Gulf of Mexico, Caribbean Sea and North Atlantic margin: (1) Blake Nose and N Atlantic Margin - Klaus et al, 2000; Norris et al, 1999; (2) Gulf of Mexico and Caribbean - Bralower, 1997; (3) Alabama - Olsson et al, 1996; Smit et al, 1994; (4) Brazos River, TX - Yancey, 1997; Bourgeois et al, 1988 (5) NE Mexico - Aschoff et al, 2001; Soria et al, 2001; Keller et al, 1994; Stinnesbeck et al, 1993; (6) S Mexico - Montanari et al, 1994; Keller and Stinnesbeck, 1996 (7) Guatemala - Keller and Stinnesbeck, 1996; (8) Cuba - Takayama et al, 2000 and (9) NE Brazil - Albertao et al, 1994. Site of our newly recognized Pacific margin example (labeled B) on the Baja California peninsula in Mexico. B: Our study area (box; see Fig. 2) and other geographic features of El Rosario area (Baja California, Mexico).

#### REFERENCES CITED IN FIGURE 1

- Albertao, G.A., Koutsoukos, E.A.M., Regali, M.P.S., Attrep Jr., M., and Martins Jr., P.P., 1994, The Cretaceous-Tertiary boundary in southern low-latitude regions: preliminary study in Pernambuco, northeastern Brazil: *Terra Nova*, no. 7, p. 366-375
- Aschoff, J.L., Giles, K.A., and Lawton, T.F., 2001, Origin of Upper Cretaceous (latest Maastrichtian) massive, boulder-cobble conglomerates, Potrerillos Formation, La Popa basin, northeastern Mexico: incised valley fill or mega tsunamite?: *Geological Society of American Abstracts with Programs*, v. 33. no. 6, p. A202
- Bourgeois, J., Hansen, T.A., Wiberg, P.L., and Kauffman, E.G., 1988, A tsunami deposit at the Cretaceous-Tertiary boundary in Texas: *Science*, v. 241, p. 567-580
- Bralower, T., 1997, Massive sediment gravity flows in the Gulf of Mexico and Caribbean during the Cretaceous/Tertiary boundary event: *Geological Society of America Abstracts with Programs*, v. 29, no. 6, p. A142
- Keller, G., and Stinnesbeck, W., 1996, Near-K/T age of clastic deposits from Texas to Brazil: impact, volcanism and/or sea-level lowstand?: *Terra Nova*, no. 8, p. 277-285

Keller, G., Stinnesbeck, W., Adatte, T., MacLeod, M., and Lowe, D.R., 1994, Field Guide to Cretaceous-Tertiary boundary sections in northeastern Mexico: Lunar and Planetary Institute Contribution 827, 110 p.

Klaus, A., Norris, R.D., Kroon, D., Smit, J., 2000, Impact induced mass wasting at the K-T boundary: Blake Nose, western North Atlantic: *Geology*, v. 28, p. 319-322

Montanari, A., Claeys, P., Asaro, F., Bermudez, J., and Smit, J., 1994, Preliminary stratigraphy and iridium and other geochemical anomalies across the K/T boundary in the Bochil section (Chiapas, southeastern Mexico): Lunar and Planetary Institute, LPI Contributions, 825, p. 84-85

Norris, R.D. and Firth, J., 1999, Mass failure of eastern North American margin triggered by the K/T impact: *Geological Society of American Abstracts with Programs*, v. 31, no. 7, p. A123

Olsson, R.K., Liu, C., and van Fossen, M., 1996, The Cretaceous-Tertiary catastrophic event at Millers Ferry, Alabama, in Ryder, G., Fastovsky, D., and Gartner, S., eds., *The Cretaceous-Tertiary Event and Other Catastrophes in Earth History*: Boulder, Colorado, Geological Society of America Special Paper 307, p. 263-277

Smit, J., Roep, Th. B., Alvarez, W., Montanari, S., and Claeys, P., 1994, Stratigraphy and sedimentology of KT clastic beds in the Moscow Landing (Alabama) outcrop: Evidence for impact-related earthquakes and tsunamis, in *New developments regarding the K/T event and other catastrophes in Earth History*: Lunar and Planetary Institute Contribution 825, p. 119-120

Soria, A.R., Liesa, C.L., Mata, M.P., Arz, J.A., Alegret, L., Arenillas, I., Melendez, A., 2001, Slumping and a sandbar deposit at the Cretaceous-Tertiary boundary in the El Tecolote section (northeastern Mexico): an impact-induced sediment gravity flow: *Geology*, v. 29, no.3, p.231-234

Stinnesbeck, W., Barbarin, J.M., Keller, G., Lopez-Oliva, J.G., Pivnik, D.A., Lyons, J.B., Officer, C.B., Adatte, T., Graup, G., Rocchia, R., and Robin, E., 1993, Deposition of channel deposits near the Cretaceous-Tertiary boundary in northeastern Mexico: Catastrophic or "normal" sedimentary?: *Geology*, v. 21, p. 797-800

Takayama, H., Tada, R., Matsui, T., Iturralde-Vincent, M.A., Oji, T., Tajika, E., Kiyokawa, S., Garcia, D., Okada, H., Hasegawa, T., and Toyoda, K., 2000, Origin of the Penalver Formation in northwestern Cuba and its relation to the K/T boundary impact event: *Sedimentary Geology*, v. 135, p. 295-320

Yancey, T.E., 1997, Tsunamites and boldite impact: Cretaceous-Tertiary boundary deposits, northern shelf of the Gulf of Mexico: *Geological Society of American Abstracts with Programs*, v. 29, no. 6, p. A142
